# Supplementary material
Source: PubMed Central journal article supplement (PMC3553787)
Supplement: AEM.02217-12_zam999103996so1.pdf [file AEM.02217-12_zam999103996so1.pdf]

## SUPPORTING INFORMATION

### Chitin-induced gene expression involved in secondary metabolic pathways in *Streptomyces coelicolor* A3(2) grown in soil

Behnam Nazari<sup>1</sup>, Michihiko Kobayashi<sup>2</sup>, Akihiro Saito<sup>3</sup>, Azam Hassaninasab<sup>2</sup>, Kiyotaka Miyashita<sup>1</sup>, Takeshi Fujii<sup>1</sup>

<sup>1</sup> Environmental Biofunction Division, National Institute for Agro-Environmental Sciences, 3-1-3 Kannondai, Tsukuba, Ibaraki 305-8604, Japan; <sup>2</sup>Institute of Applied Biochemistry, and Graduate School of Life and Environmental Sciences, The University of Tsukuba, 1-1-1 Tennodai, Tsukuba, Ibaraki 305-8572, Japan; <sup>3</sup> Shizuoka Institute of Science and Technology, 2200-2 Toyosawa, Fukuroi, Shizuoka 437-8555, Japan

**Table S1. Primers used for real-time RT-PCR.**

| Gene                        | Primer name                      | Sequence                                       | Secondary metabolite gene cluster                                                 | Reference                    |
|-----------------------------|----------------------------------|------------------------------------------------|-----------------------------------------------------------------------------------|------------------------------|
| sco3217 ( <i>cdaR</i> )     | cdaR-F183<br>cdaR-R302           | CTCCGCTAATCAGGTCGTTTCT<br>CGGAAGATTTTGCGCAGTGT |                                                                                   |                              |
| SCO3230 ( <i>cdaSyn</i> )   | cdaSyn-F12302<br>cdaSyn-R12422   | GCCCCGGCGTCGAGTCCA<br>GAGGCGGGCCTGTTTCGTTCTG   | Calcium-dependent antibiotic (SCO3210-49) Non-ribosomal peptide synthetase (NRPS) | Bentley <i>et al.</i> , 2002 |
| SCO3245 ( <i>hcmO</i> )     | hcmO-F219<br>hcmO-R343           | CATGGAGGTGCGGGACTGGTC<br>GAGCATGGTGTGCAGGTCGG  |                                                                                   |                              |
| SCO5085 ( <i>actII4</i> )   | actII4-F485<br>actII4-R604       | TGCGGCTTTTTGGAATGC<br>CGTGCAGGGTCTCGTTCAG      |                                                                                   |                              |
| SCO5077 ( <i>actVA2</i> )   | actVA2-F136<br>actVA2-R258       | ATCGGCGGGCACAACT<br>CACTTCGATACCGGTACGTT       | Actinorhodin (SCO5071-5092) Type II polyketide synthase (PKS)                     | Bentley <i>et al.</i> , 2002 |
| SCO5087( <i>actI-orf1</i> ) | actI-orf1-F250<br>actI-orf1-R353 | GACCCCTCGCCCTACCGTTCA<br>TGCGAGGCCCGGTCCATC    |                                                                                   |                              |
| SCO5877 ( <i>redD</i> )     | red-F195<br>red-R319             | GGACCACGGACCCAGCCTGTA<br>CCACCAGCGTACGGACCTTGC | Prodiginines antibiotic (SCO5877-98) NRPS; type I modular PKS                     | Bentley <i>et al.</i> , 2002 |
| SCO5880 ( <i>redY</i> )     | redY-F147<br>redY-R261           | GGATGCCCCATTCCACTACTT<br>CGCCATCGTGTCGAACAC    |                                                                                   |                              |
| SCO6266 ( <i>scbA</i> )     | scbA-F221<br>scbA-R315           | TGCTGATCGCCGAGACCC<br>TCGAGGTGGCAGGTGTAGTCC    |                                                                                   |                              |
| SCO6276 ( <i>cpkD</i> )     | cpkD-F1092<br>cpkD-R1182         | CGACGGCTGCTGGGAGATGG<br>TCCTGCACCTGGGCGATGAAG  | Cryptic polyketide synthase (SCO6265-86) Type I modular PKS                       | Gottelt <i>et al.</i> , 2010 |
| SCO6282 ( <i>cpkI</i> )     | cpkI-F362<br>cpkI-R453           | AGGCCGAGTACGACAAGGTG<br>CCGGAGGAGATGTTGACGATA  |                                                                                   |                              |
| SCO6430 <sup>a</sup>        | SCO6430-F458                     | TGCAGTCCACCCAGATGTTC                           |                                                                                   |                              |

|                                      |                                |                                                |                                                                                                       |                              |
|--------------------------------------|--------------------------------|------------------------------------------------|-------------------------------------------------------------------------------------------------------|------------------------------|
|                                      | SCO6430-R579                   | CCAGACGGTGACCACGTACA                           |                                                                                                       |                              |
| SCO6433                              | SCO6433-F190<br>SCO6433-R283   | GCGGTGTACGAGGAGGACGAG<br>CGGGGACGACGATGGTGT    | Unknown NRPS (SCO6429-40)                                                                             | Challis & Hopwood, 2003      |
| SCO6435                              | SCO6435-F109<br>SCO6435-R208   | GGCATGGGGGTGTGCACCGTC<br>CGTCCGCTCCCCGTGACCTC  |                                                                                                       |                              |
| SCO6764                              | SCO6764-F649<br>SCO6764-R744   | CCGTTCCCGCTGGACGAACTG<br>GCGTGCAGGGCCTTGTCGATG | Squalene-hopene cyclase cluster<br>(6759-6771)                                                        | Challis & Hopwood, 2003      |
| SCO6766 <sup>a</sup>                 | SCO6766-F35<br>SCO6766-R91     | CTACATACCTGGCCGAACAGAAG<br>CCACGATGAGCGGGAAC   |                                                                                                       |                              |
| SCO0489 ( <i>cchA</i> ) <sup>a</sup> | cchA-F3<br>cchA-R66            | GAGCACCAACCCCTTCGA<br>CTGGCCCTCGTCTGTCAC       | Coelichelin (SCO0489-99); NRPS                                                                        | Patel <i>et al.</i> , 2010   |
| SCO0494 ( <i>cchF</i> )              | cchF-F216<br>cchF-R308         | GGTCGTCTCCGTGGCTACAC<br>TGATGTCGGGGCTCTGGC     |                                                                                                       |                              |
| SCO0381 <sup>a</sup>                 | SCO0381-F1280<br>SCO0381-R1351 | GCCCGGACATCCGAAGAC<br>CGCTGCGTCCGCTGATCT       |                                                                                                       |                              |
| SCO0392                              | SCO0392-F1117<br>SCO0392-R1208 | CTCGTCTGCCGTGGAACCTG<br>CGGCCTCGACCACGCTCAGTT  | Unknown deoxysugar<br>(SCO0381-401)                                                                   | Challis & Hopwood, 2003      |
| SCO0398                              | SCO0398-F173<br>SCO0398-R261   | AGGACTCGCGCATCCGGTACA<br>TGCGAGGCCCACTTGAACAGC |                                                                                                       |                              |
| SCO5231 ( <i>dasR</i> ) <sup>b</sup> | dasR-F247<br>dasR-R370         | TTCGTGCCAAGCCCAAGGT<br>GGTCGTGCGGGTGTAGT       | Pleiotropic regulator for antibiotic<br>production and chitin metabolism;<br>nutrient-sensing protein | Rigali <i>et al.</i> , 2006  |
| SCO5820 ( <i>hrdB</i> ) <sup>b</sup> | hrdB-F<br>hrdB-R               | TCGACTACCAAGGGCTACAA<br>ACCATGTGACCGGGATAC     | Major sigma factor in streptomycetes                                                                  | Bentley <i>et al.</i> , 2002 |
| SCO5920                              | SCO5920 -F<br>SCO5920 -R       | AACCGCACACGCACGAACGA<br>TGCCGCCCTTCCGGAGTCG    | DEAD-box RNA helicase                                                                                 | Bentley <i>et al.</i> , 2002 |
| SCO5921 ( <i>scoF5</i> )             | scoF5-F<br>scoF5-R             | GTGGCGGGCTGATGTGT<br>TGCGCGATGTCGAAGTTCACC     | Cold shock protein                                                                                    | Bentley <i>et al.</i> , 2002 |

<sup>a</sup> The primer was already reported by Tanaka *et al.*, 2010.

<sup>b</sup> The primer was already reported by Nazari *et al.*, 2011.

## References for Table S1.

1. Bentley SD, Chater KF, Cerdeno-Tarraga AM, Challis GL, Thomson NR, James KD, Harris DE, Quail MA, Kieser H, Harper D, Bateman A, Brown S, Chandra G, Chen CW, Collins M, Cronin A, Fraser A, Goble A, Hidalgo J, Hornsby T, Howarth S, Huang CH, Kieser T, Larke L, Murphy L, Oliver K, O'Neil S, Rabinowitsch E, Rajandream MA, Rutherford K, Rutter S, Seeger K, Saunders D, Sharp S, Squares R, Squares S, Taylor K, Warren T, Wietzorrek A, Woodward J, Barrell BG, Parkhill J, Hopwood DA. 2002. Complete genome sequence of the model actinomycete *Streptomyces coelicolor* A3(2). *Nature* **417**:141-147.

2. **Challis GL, Hopwood DA.** 2003. Synergy and contingency as driving forces for the evolution of multiple secondary metabolite production by *Streptomyces* species. Proc. Natl. Acad. Sci. U.S.A. **25**:14555-14561.
3. **Gottelt M, Kol S, Gomez-Escribano JP, Bibb M, Takano E.** 2010. Deletion of a regulatory gene within the *cpk* gene cluster reveals novel antibacterial activity in *Streptomyces coelicolor* A3(2). Microbiology **156**:2343-2353.
4. **Nazari B, Saito A, Kobayashi M, Miyashita K, Wang Y, Fujii T.** 2011. High expression levels of chitinase genes in *Streptomyces coelicolor* A3(2) grown in soil. FEMS Microbiol. Ecol. **77**:623-635.
5. **Patel P, Song L, Challis GL.** 2010. Distinct extracytoplasmic siderophore binding proteins recognize Ferrioxamines and Ferricoelichelin in *Streptomyces coelicolor* A3(2). *Biochem.* **49**: 8033-8042.
6. **Rigali S, Nothhaft H, Noens EE, Schlicht M, Colson S, Müller M, Joris B, Koerten HK, Hopwood DA, Titgemeyer F, van Wezel GP.** 2006. The sugar phosphotransferase system of *Streptomyces coelicolor* is regulated by the GntR-family regulator DasR and links *N*-acetylglucosamine metabolism to the control of development. Mol. Microbiol. **61**:1237-1251.
7. **Tanaka Y, Hosaka T, Ochi K.** 2010. Rare earth elements activate the secondary metabolite-biosynthetic gene clusters in *Streptomyces coelicolor* A3(2). J. Antibiot. **63**:477-481.

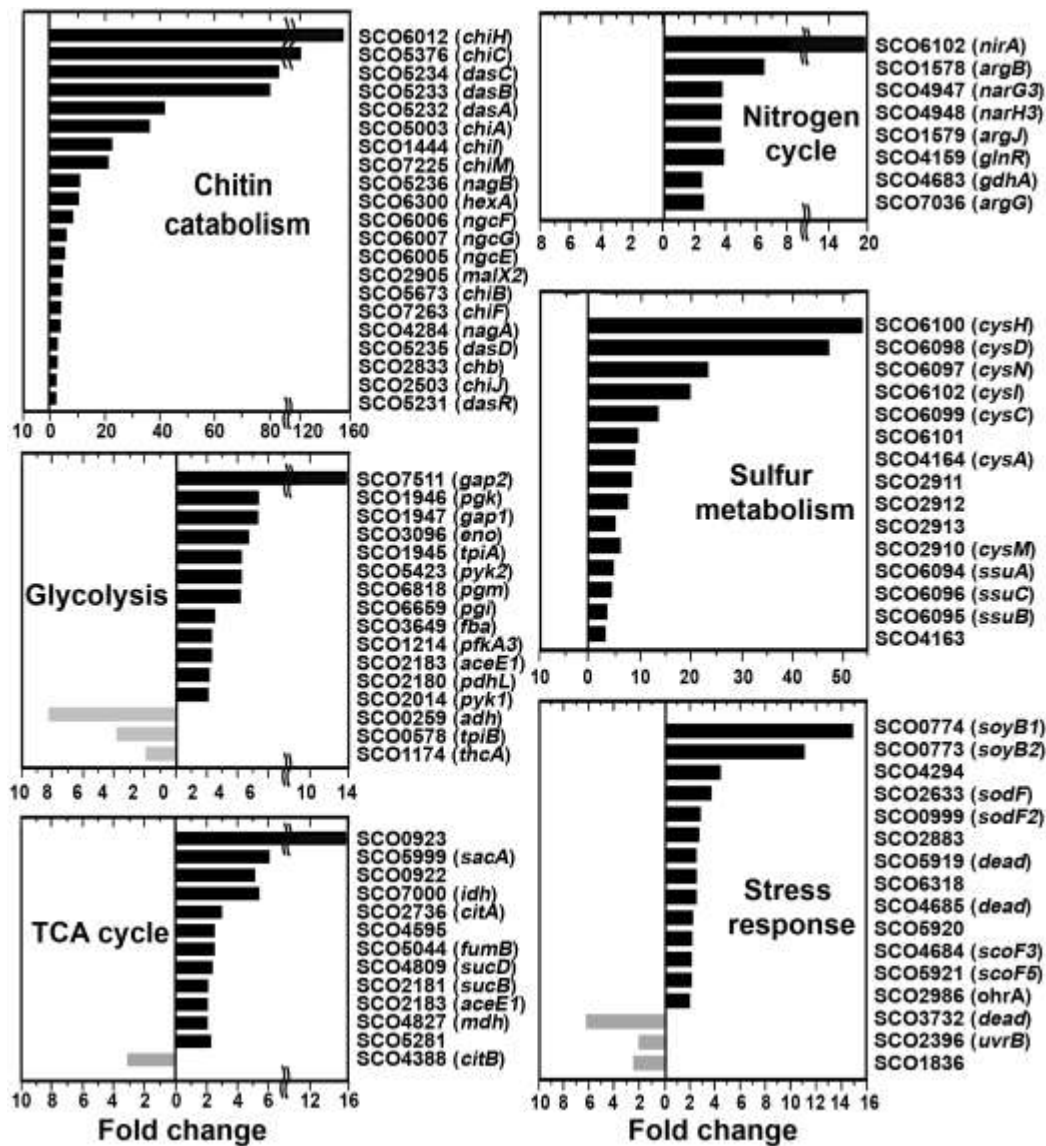

**FIGURE S1.** Differential upregulation of genes in *S. coelicolor* A3(2) grown in soil with (■) and without (■) chitin. Only genes relevant to the discussion are shown. Supplementary Dataset S1 presents the complete sets of differentially expressed genes. ⌘ indicates genes that were highly expressed on a different scale compared with the other genes.

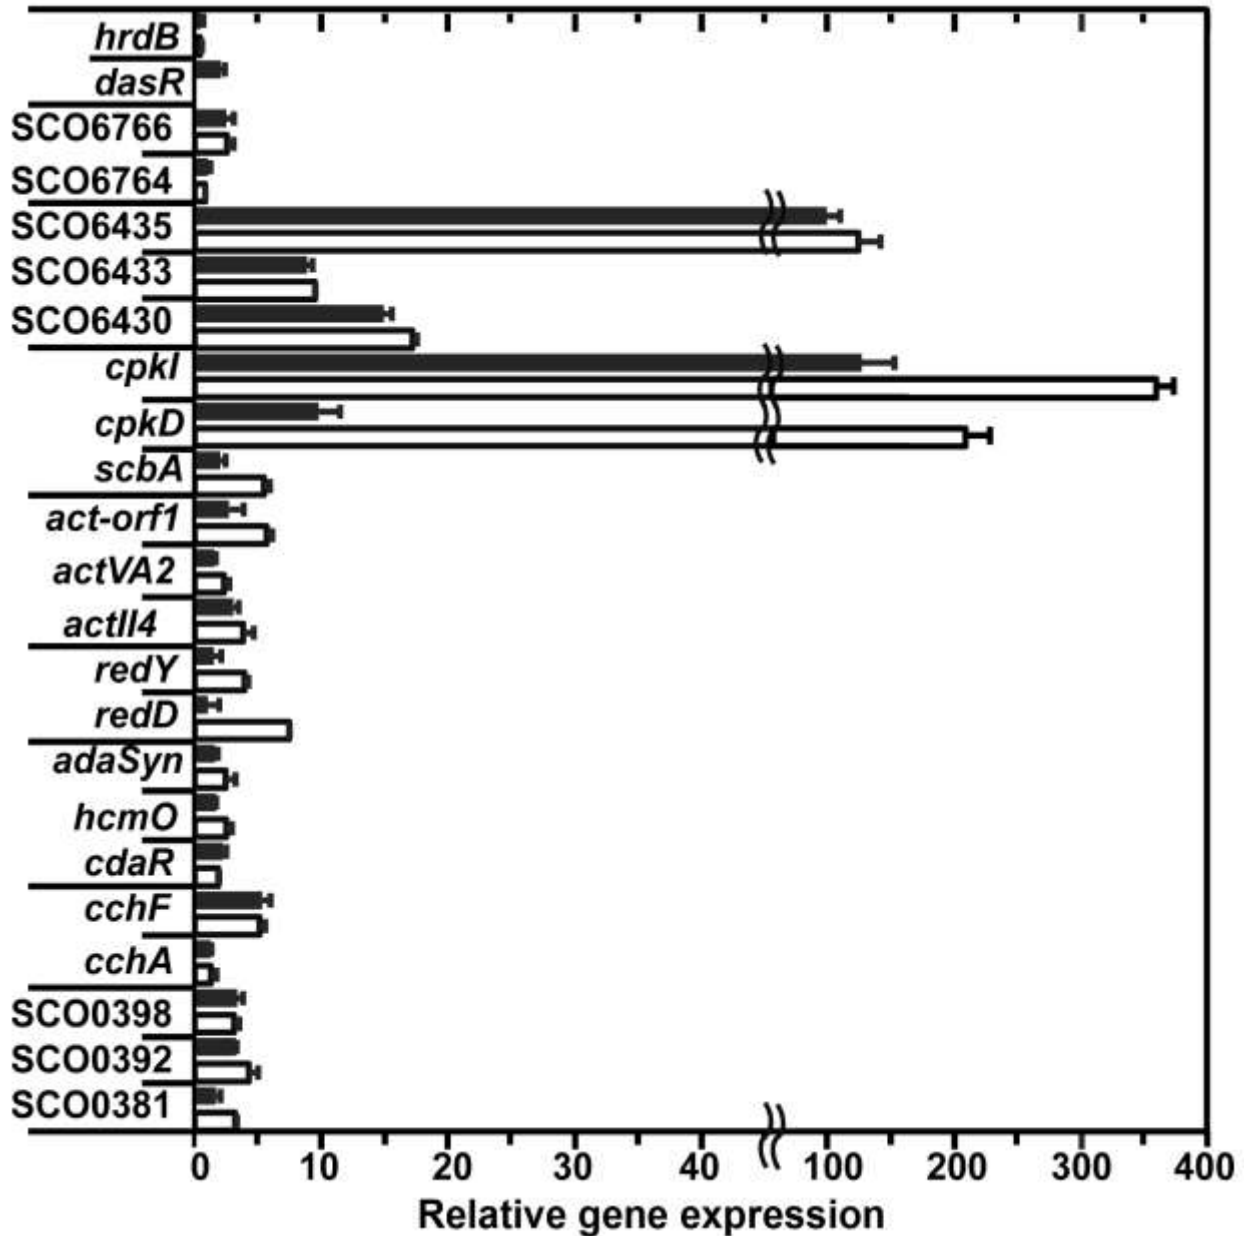

**FIGURE S2.** Validation of microarray data by qRT-PCR for genes involved in biosynthesis of secondary metabolites. The effects of chitin on gene expression in the wild type and *dasR*-disrupted mutant of *S. coelicolor* A3(2) were investigated in soil at various time points after spore inoculation. The relative gene expression levels in the wild type (■) and mutant (□) grown in chitin-amended soil were calculated taking the expression level in the control (the wild type grown in soil without chitin) as unity (1). In the figure, only the maximum induction levels for each gene during the growth phase are indicated.

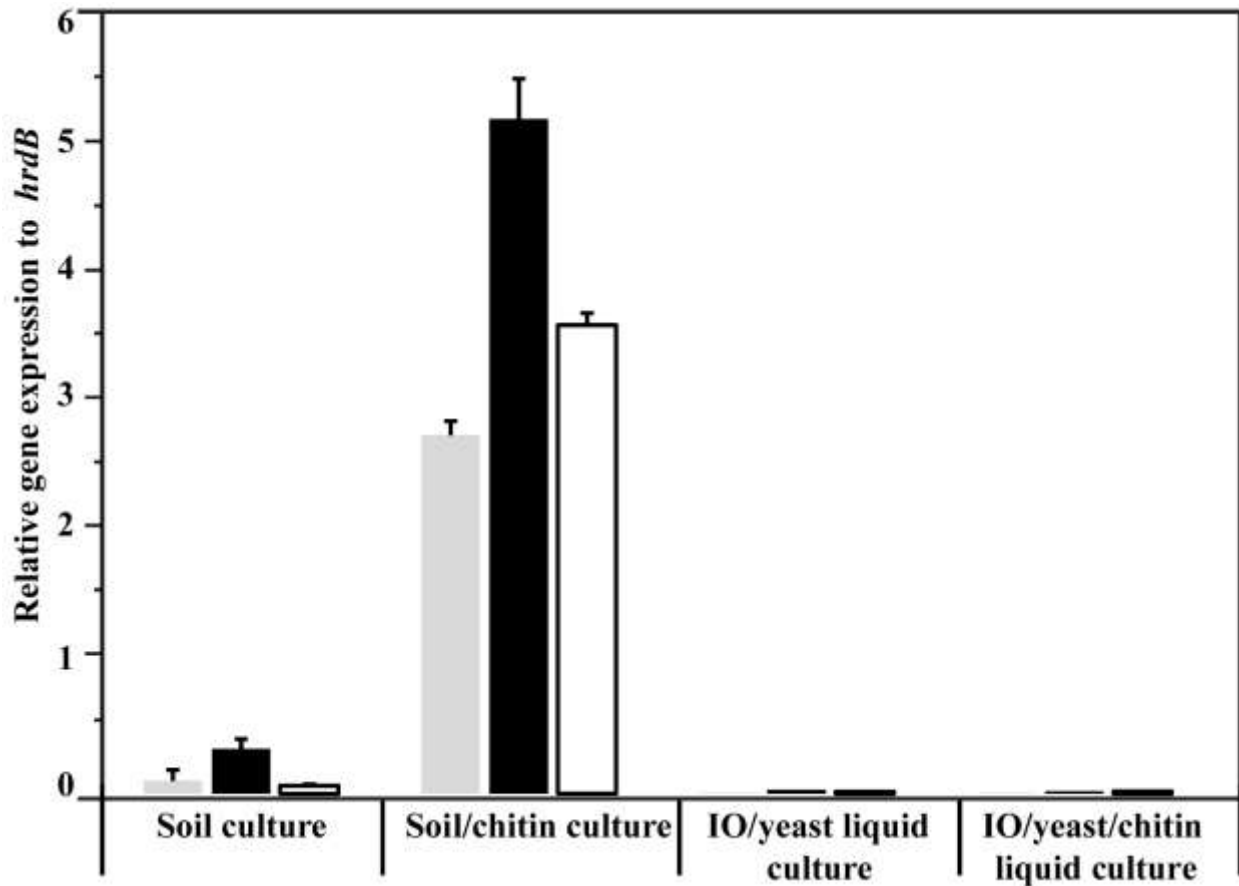

**FIGURE S3.** Comparison of expression of putative NRPS gene cluster SCO6429-40 in soil and liquid cultures in the presence and absence of chitin. The transcription levels of three genes, SCO6430 (■), SCO6433 (■), and SCO6435 (□), in *S. coelicolor* A3(2) grown in soil and liquid cultures were investigated using qRT-PCR. These genes were only induced in soil cultures and the addition of chitin enhanced their expression.

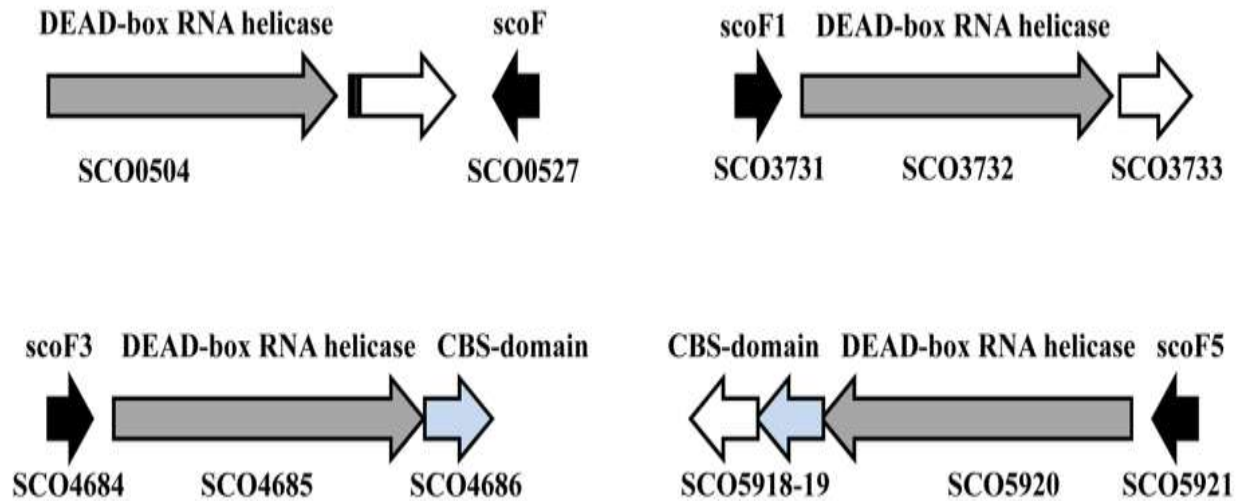

**FIGURE S4.** Organization of the genes for DEAD-box RNA helicases (gray arrows) and cold shock proteins (black arrows) in the genome of *S. coelicolor* A3(2). Expression of all genes indicated was dramatically reduced in the *dasR* mutant.

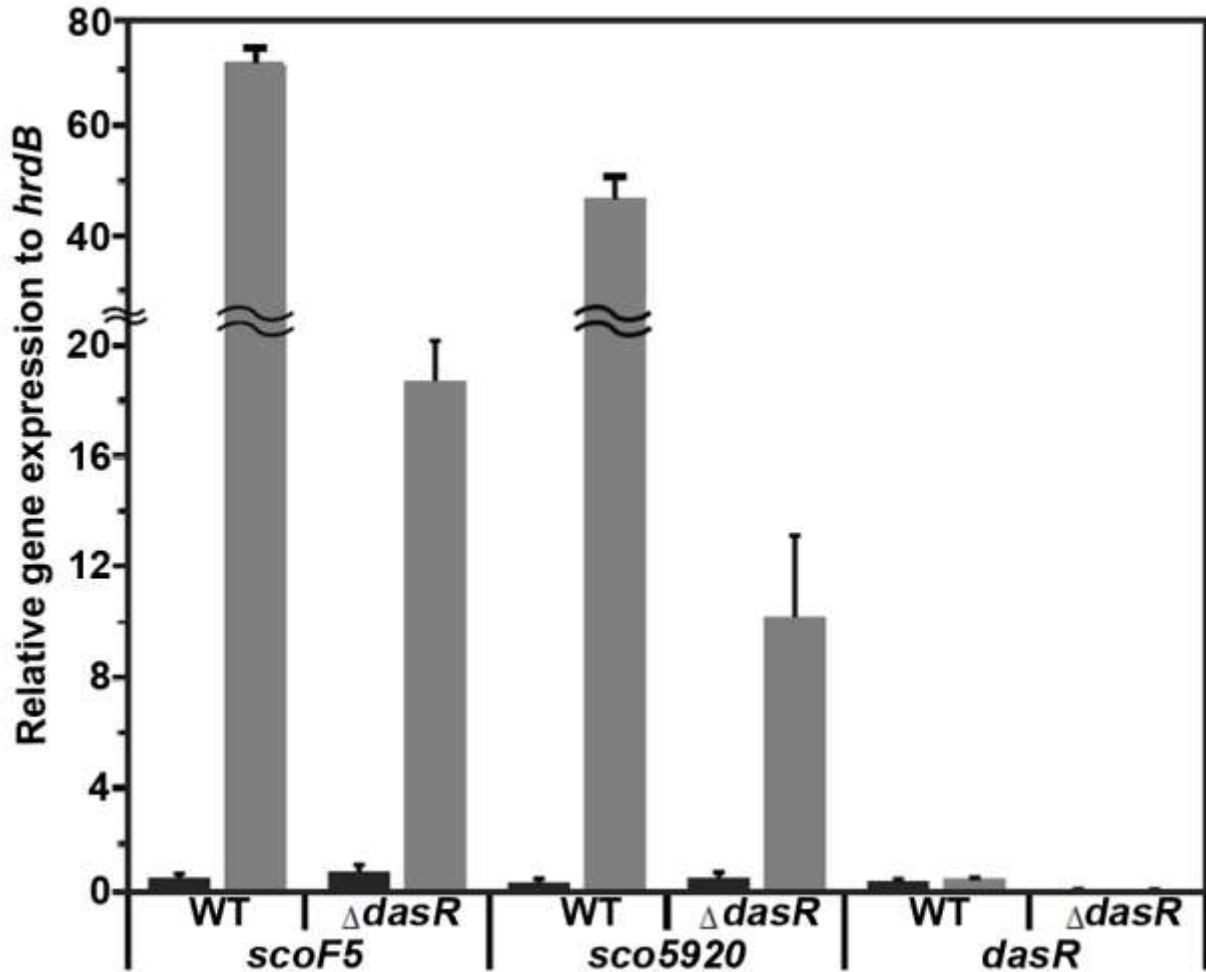

**FIGURE S5.** Effects of temperature downshifts on gene expression of a cold shock protein (*scoF5*) and a DEAD box RNA helicase (SCO5920). The transcriptional responses to a temperature downshift from 30°C (■) to 10°C (■) of the wild type and YU1 mutant of *S. coelicolor* A3(2) grown in a minimal medium were investigated using qRT-PCR. A temperature downshift triggers induction of the cold shock protein (*scoF5*) and the DEAD box RNA helicase (SCO5920) in the wild type and YU1 mutant, but to different levels. The induction of these proteins was reduced in the YU1 mutant. ≡ shows genes that were highly expressed on a different scale compared with the other genes. The transcriptional analysis of genes involved in the cold-stress response of *S. coelicolor* A3(2) was performed on NMP liquid medium according to a previously reported method (Kormanec & Sevcikova, (2000) *Mol Gen Genet* **264**:251-256).
